# Supplementary material for: Domestication Impacts the Wheat-Associated Microbiota and the Rhizosphere Colonization by Seed- and Soil-Originated Microbiomes, Across Different Fields
Source: Front Plant Sci. 2022 Jan 12;12:806915. doi: 10.3389/fpls.2021.806915 (PMC8789879; doi:10.3389/fpls.2021.806915)
Supplement: Supplementary file 2 [file Table_1.xlsx]

## Sheet: Table S3
Table S3	Kruskal-Wallis rank-sum test results. Significant differences in microbial communities richness and diversity between groups and experimental factors within datasets were detected
		Observed richness						Simpson						Shannon
		Bacteria			Fungi			Bacteria			Fungi			Bacteria			Fungi
Dataset	Factor	chi-squared	df	p value	chi-squared	df	p value	chi-squared	df	p value	chi-squared	df	p value	chi-squared	df	p value	chi-squared	df	p value
Rhizosphere	location	2.56	2	0.2777	11.08	3	0.003914	0.618	2	0.734	15.21	2	0.0005	2.31	2	0.308	13.12	2	0.00141
Root endophytes	location	5.8	2	0.054	13.53	3	0.001154	8.14	2	0.017	6.44	2	0.0399	6.18	2	0.045	15.12	2	0.000519
Bulk soil	location	1.35	2	0.704	7.55	3	0.02286	7.58	2	0.37	13.98	2	0.00092	14.7	2	0.547	15.12	2	0.000519
Seedbed	location	5.42	2	0.06	6.25	3	0.043	5.42	2	0.06	0.47	3	0.7897	1.18	2	0.39	1.8	3	0.4054
Groß-Gerau	plant habitat	13.58	2	0.0011	13.09	3	0.001437	25.98	2	2.27 10-6	15.12	2	0.000256	23.87	2	6.70 10-6	14.15	2	0.000844
GG_rhizosphere	species	2.58	3	0.45	1.65	3	0.6478	4.23	1	0.23	1.106	3	0.775	3.3	3	0.34	1.77	3	0.62
	form	0.92	1	0.33	0	1	1	0.02	1	0.87	0.533	1	0.4652	0.1	1	0.74	0.133	1	0.715
GG_bulk soil	species	8.74	3	0.03	0.619	3	0.8919	6.84	1	0.07	0.743	3	0.862	9.35	3	0.02	3.307	3	0.346
	form	0.02	1	0.87	0.104	1	0.74	1.25	1	0.26	0.23	1	0.631	0.41	1	0.52	1.641	1	0.2002
GG_root endosphere	species	5.61	3	0.13	2.28	3	0.51	6.84	1	0.07	5.61	3	0.131	7.82	3	0.04	6.69	3	0.08238
	form	4.33	1	0.03	0.1	1	0.7488	4.33	1	0.03	1.25	1	0.2623	5.76	1	0.01	1.25	1	0.2623
Weilburger Grenze	plant habitat	1.27	2	0.52	20.91	2	2.88 10-5	23.55	2	7.69 10-6	24.69	2	4.33 10-6	17.69	2	1.44 10-4	25.03	2	3.67 10-6
WG_rhizosphere	species	5.28	3	0.15	3.82	3	0.2813	7.95	3	0.046	2.37	3	0.4976	5.4	3	0.144	3.39	3	0.3348
	form	4.03	1	0.044	0.134	1	0.7138	7.5	1	0.006	2.13	1	0.1441	4.8	1	0.028	0.833	1	0.3613
WG_bulk soil	species	1.86	3	0.6	4.43	3	0.2181	8.07	3	0.04	2.12	3	0.5462	0.74	3	0.86	4.58	3	0.2044
	form	0.16	1	0.68	0.102	1	0.7488	0.02	1	0.87	0.23	1	0.631	0.41	1	0.52	0.025	1	0.8728
WG_root endosphere	species	6.64	3	0.084	1.99	3	0.5736	7.2	3	0.065	5.35	3	0.1473	6.69	3	0.08	6.38	3	0.09433
	form	0.64	1	0.42	0.025	1	0.8726	0.92	1	0.33	0.41	1	0.5218	0.025	1	0.87	0.102	1	0.7488
Rauischholzhausen	plant habitat	7.34	2	0.02	21.82	2	1.83 10-5	24.03	2	6.03 10-6	17.89	2	1.30 10-4	23.59	2	7.51 10-6	22.34	2	1.40 10-5
RH_rhizosphere	species	1.04	3	0.79	4.09	3	0.2511	1.03	3	0.79	1.28	3	0.732	0.92	3	0.81	0.78	3	0.8524
	form	0.13	1	0.7	1.64	1	0.1992	0.033	1	0.85	0.833	1	0.3613	0.3	1	0.58	0.533	1	0.4652
RH_bulk soil	species	7.8	3	0.04	7.05	3	0.07028	0.23	3	0.97	1.87	3	0.5994	5.2	3	0.15	5.97	3	0.1129
	form	1.64	1	0.2	4.33	1	0.03737	0.1	1	0.74	0.02	1	0.8728	0.64	1	0.42	1.641	1	0.2002
RH_root endosphere	species	4.23	3	0.23	7.8	3	0.05012	3.2	3	0.36	3.82	3	0.2815	3.3	3	0.34	5.76	3	0.1234
	form	2.56	1	0.1	4.34	1	0.03704	1.64	1	0.2	0.923	1	0.3367	1.64	1	0.2	2.56	1	0.109

## Sheet: Table S6
Table S6	Composition of seed-transmitted bacterial and fungal genera
Habitat	location	A. tauschii		T. aestivum		T. dicoccoides		T. durum
		Bacteria	Fungi	Bacteria	Fungi	Bacteria	Fungi	Bacteria	Fungi
Rhizosphere	GG	Verticiella		Pedobacter	Stemphylium	Brevundimonas	Pyrenophora	Streptococcus
		Chryseobacterium		Brevundimonas		Stenotrophomonas	Neoascochyta	Ralstonia
		Rhodococcus				Sphingomonas
		Pseudomonas				Pseudomonas
		Stenotrophomonas
		Plantibacter
		Methylobacterium-Methylorubrum
		Luteibacter
		Massilia
	WG	Aeromicrobium	Ulocladium	none	Ulocladium	none	Ulocladium	none
	RH	Methylobacterium-Methylorubrum	Alternaria	Brevundimonas	Alternaria	Pseudomonas	Alternaria	Pseudomonas	Alternaria
		Cutibacterium				Cutibacterium	Pyrenophora	Streptococcus
		Allorhizobium-Neorhizobium-Pararhizobium-Rhizobium				Symbiobacterium	Neoascochyta
		Nocardioides
		Massilia
Root endosphere	GG	Rhodococcus	unknown fungi	Brevundimonas	Stemphylium	Sphingomonas	unknown fungi	Pseudomonas	unknown fungi
		Enterobacteriaceae		Pedobacter	unknown fungi	Pseudomonas
		Chryseobacterium
		Verticiella
		Pseudomonas
		Stenotrophomonas
		Massilia
		Allorhizobium-Neorhizobium-Pararhizobium-Rhizobium
		Nocardioides
		Methylobacterium-Methylorubrum
		Luteibacter
		Duganella
		Comamonadaceae
	WG	Methylobacterium-Methylorubrum	unknown fungi	Cutibacterium	unknown fungi	Sphingomonas		Streptococcus
		Plantibacter				Cutibacterium		Methylobacterium-Methylorubrum
		Cutibacterium						Cutibacterium
		Aeromicrobium
		Stenotrophomonas
		Massilia
	RH	Pseudomonas	Alternaria	Duganella	Alternaria	Symbiobacterium	Neoascochyta	Streptococcus	Alternaria
		Plantibacter	unknown fungi	Massilia	unknown fungi	Cutibacterium	Alternaria	Pseudomonas	unknown fungi
		Verticiella		Brevundimonas		Stenotrophomonas		Cutibacterium
		Cutibacterium		Cutibacterium		Pseudomonas
		Comamonadaceae		Symbiobacterium		Sphingomonas
		Allorhizobium-Neorhizobium-Pararhizobium-Rhizobium
		Massilia
